# Supplementary material
Source: PubMed Central journal article supplement (PMC3048187)

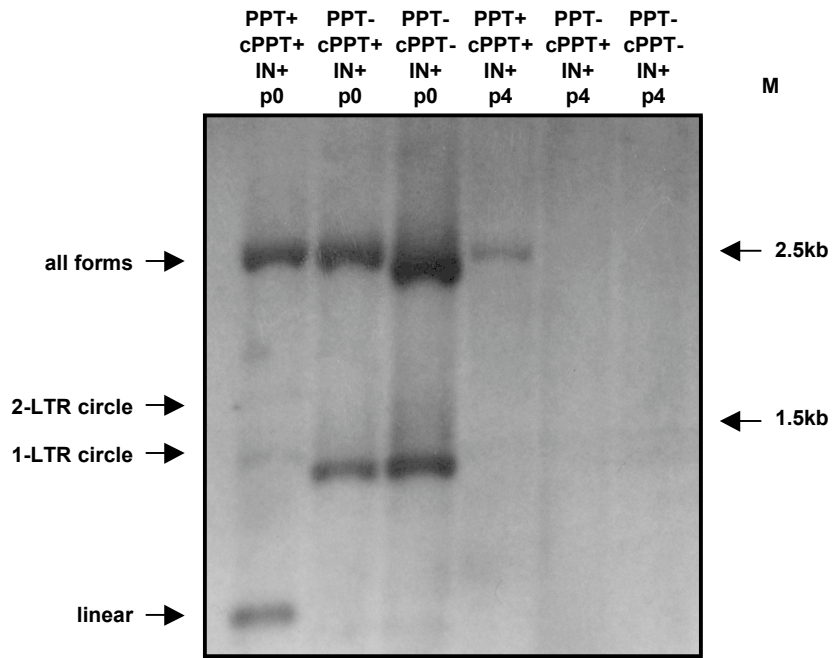

**Figure S7**

Supplement: mt2010277x7.pdf [file mt2010277x7.pdf]
